# Supplementary material for: Modular Synthesis of Heparin-Related Tetra-, Hexa- and Octasaccharides with Differential O-6 Protections: Programming for Regiodefined 6-O-Modifications
Source: PubMed Central journal article supplement (PMC4421873; doi:10.3390/molecules20046167), 2015-04-09

# Supplementary File

Methyl 6-O-acetyl-2-azido-3-O-benzyl-2-deoxy- $\alpha$ -D-glucopyranosyl-(1 $\rightarrow$ 4)-(methyl 2-O-benzoyl-3-O-benzyl- $\alpha$ -L-idopyranoside) uronate (4)

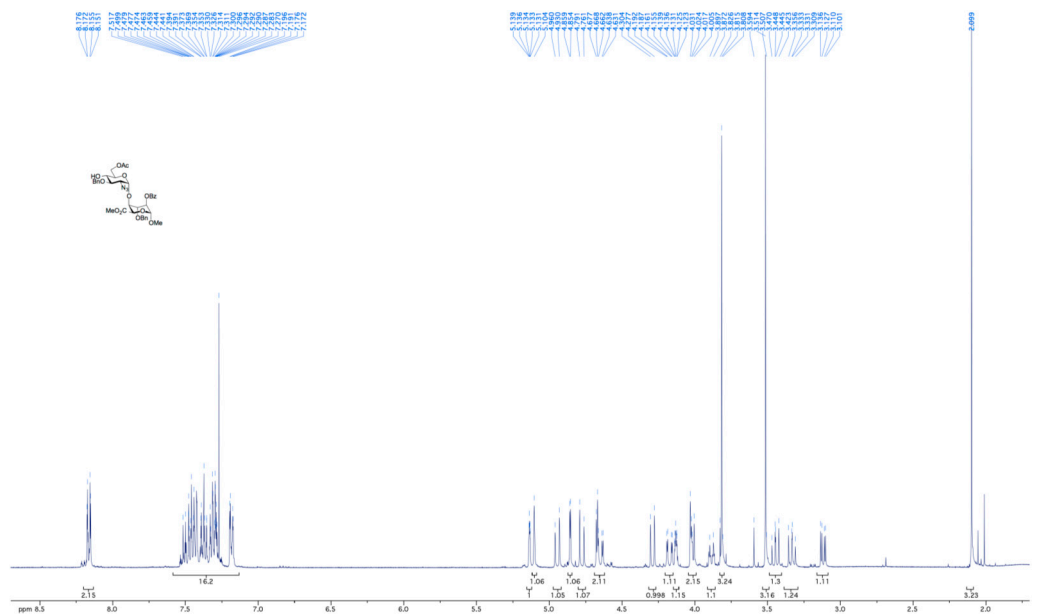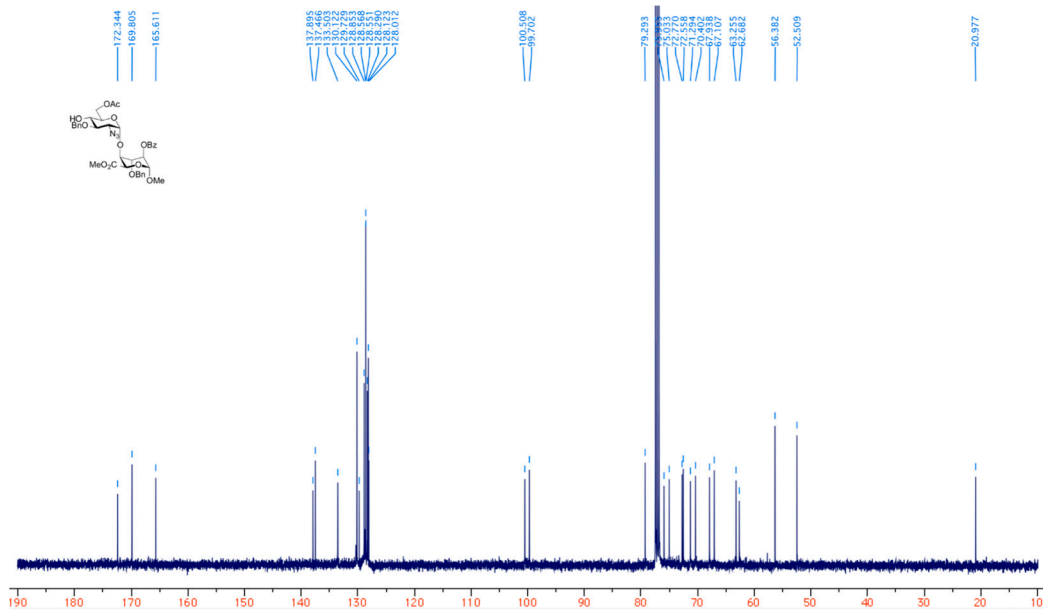

**Methyl (2-azido-3,6-di-*O*-benzyl-2-deoxy-4-*O*-*p*-methoxybenzyl- $\alpha$ -D-glucopyranosyl-(1-4)-(methyl 2-*O*-benzoyl-3-*O*-benzyl- $\alpha$ -L-idopyranosyl) uronate)-(1-4)-6-*O*-acetyl-2-azido-3-*O*-benzyl-2-deoxy- $\alpha$ -D-glucopyranosyl-(1-4)-(methyl 2-*O*-benzoyl-3-*O*-benzyl- $\alpha$ -L-idopyranoside) uronate (5)**

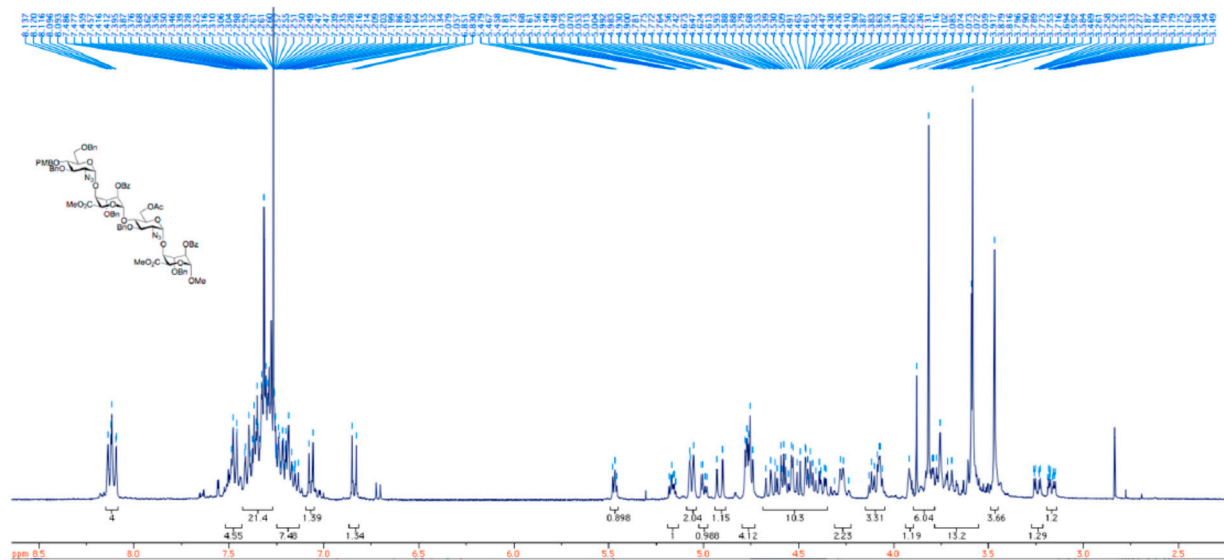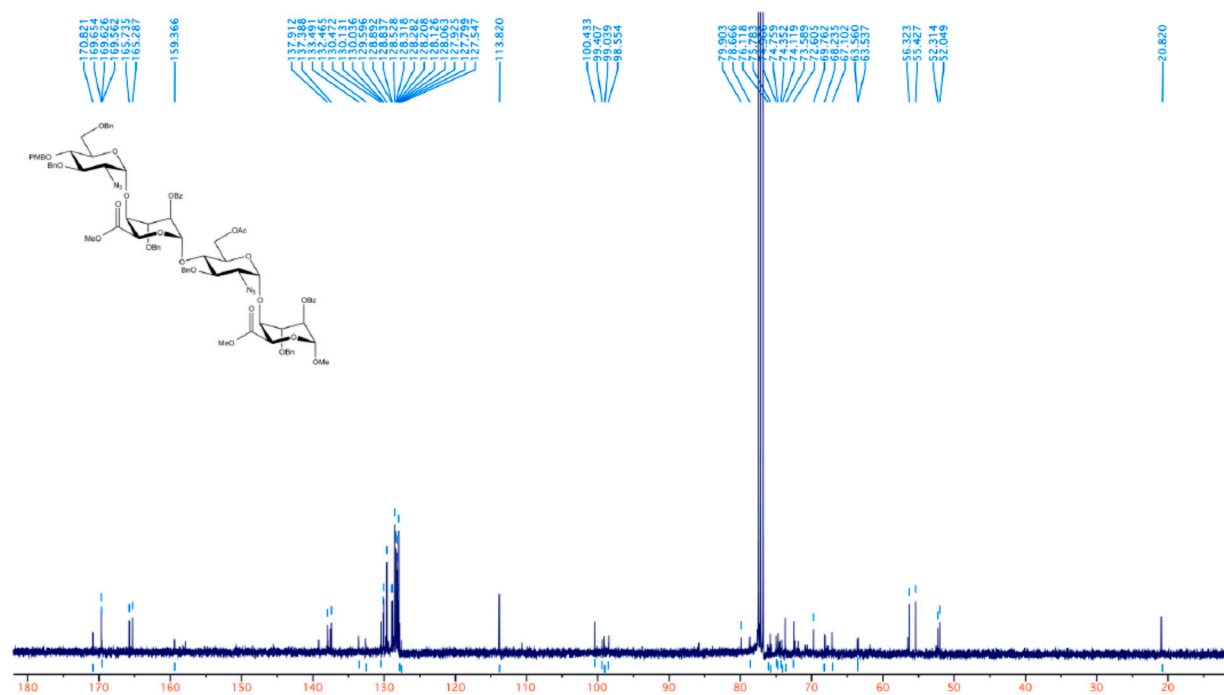

**Methyl (2-azido-3,6-di-*O*-benzyl-2-deoxy-4-hydroxy- $\alpha$ -D-glucopyranosyl-(1-4)-(methyl 2-*O*-benzoyl-3-*O*-benzyl- $\alpha$ -L-idopyranosyl) uronate)-(1-4)-6-*O*-acetyl-2-azido-3-*O*-benzyl-2-deoxy- $\alpha$ -D-glucopyranosyl-(1-4)-(methyl 2-*O*-benzoyl-3-*O*-benzyl- $\alpha$ -Lidopyranoside)uronate (O4 deprotection of 5). LCMS Data 1.**

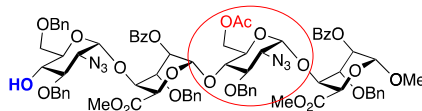

## Display Report

### Analysis Info

Analysis Name MB 05-5 GMA4.D  
 Method 90ACN.M  
 Sample Name MB 05-5/GMA4  
 Comment MB 05-5/GMA4  
 Kinetex XB C18 4.6x100mm 5u  
 90ACN 1ml/mn +ve APCI

Acquisition Date 13/02/2015 16:22:49  
 Operator mib  
 Instrument LC-MSD-Trap-SL

### Acquisition Parameter

| Ion Source Type   | APCI           | Ion Polarity | Positive  | Alternating Ion Polarity | off      |
|-------------------|----------------|--------------|-----------|--------------------------|----------|
| Mass Range Mode   | Std/Normal     | Scan Begin   | 500 m/z   | Scan End                 | 2200 m/z |
| Capillary Exit    | 181.0 Volt     | Skim 1       | 40.0 Volt | Trap Drive               | 131.0    |
| Accumulation Time | 200000 $\mu$ s | Averages     | 7 Spectra | Auto MS/MS               | off      |

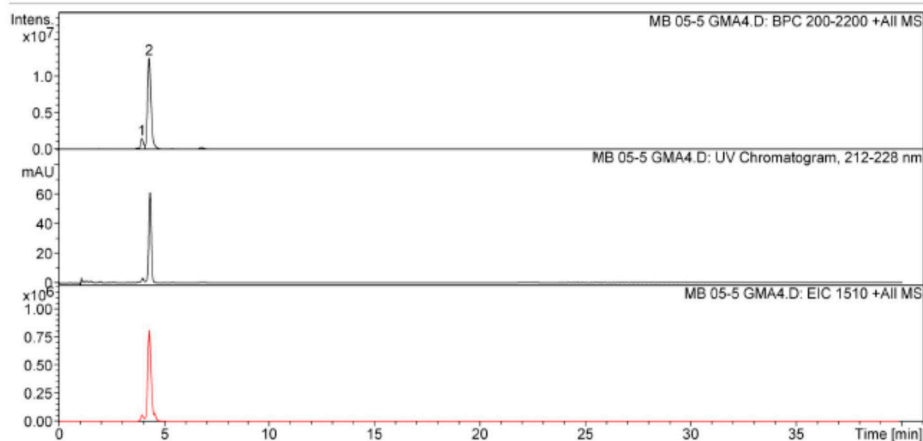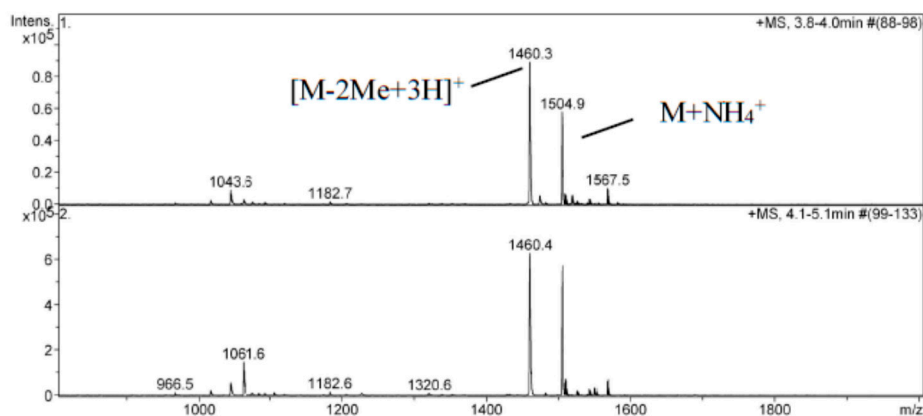





**Methyl (6-*O*-acetyl-2-azido-3-*O*-benzyl-2-deoxy-4-*O*-*p*-methoxybenzyl- $\alpha$ -D-glucopyranosyl-(1-4)-(methyl 2-*O*-benzoyl-3-*O*-benzyl- $\alpha$ -L-idopyranosyl) uronate)-(1-4)-2-azido-3,6-di-*O*-benzyl-2-deoxy- $\alpha$ -D-glucopyranosyl-(1-4)-(methyl 2-*O*-benzoyl-3-*O*-benzyl- $\alpha$ -L-idopyranosyl) uronate)-(1-4)-6-*O*-acetyl-2-azido-3-*O*-benzyl-2-deoxy- $\alpha$ -D-glucopyranosyl-(1-4)-(methyl 2-*O*-benzoyl-3-*O*-benzyl- $\alpha$ -L-idopyranoside) urinate (7)**

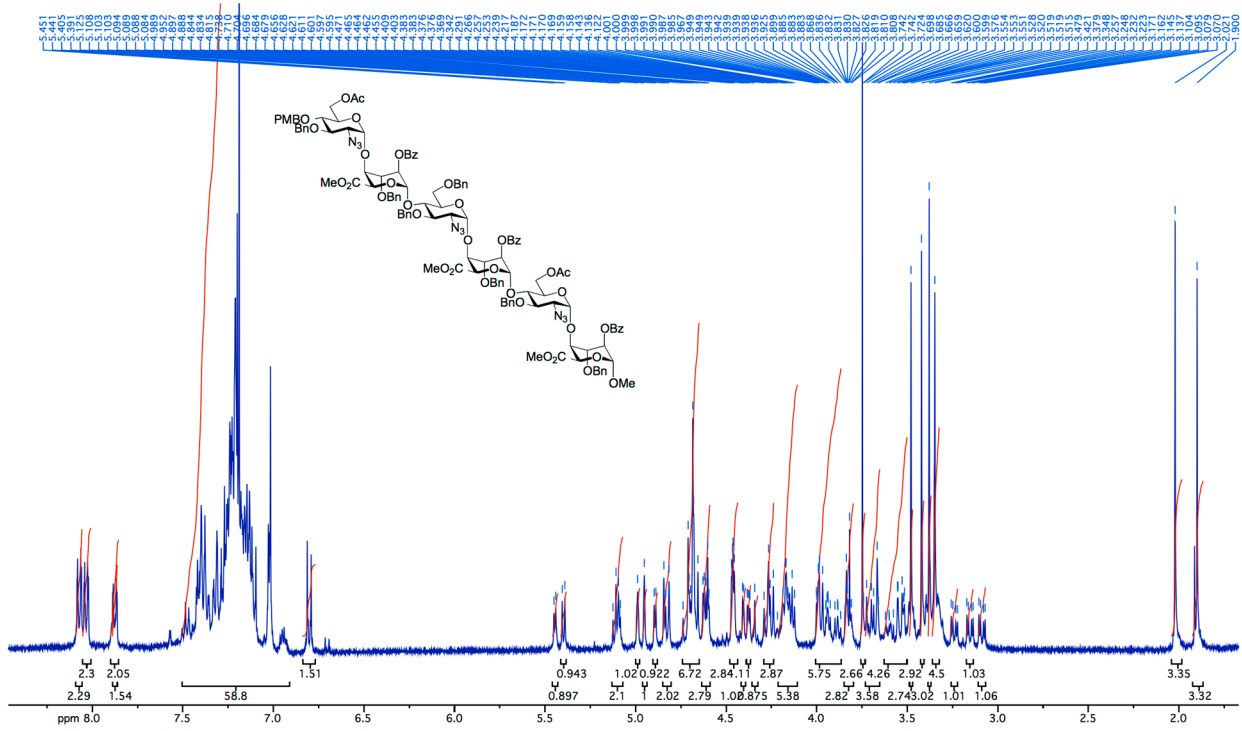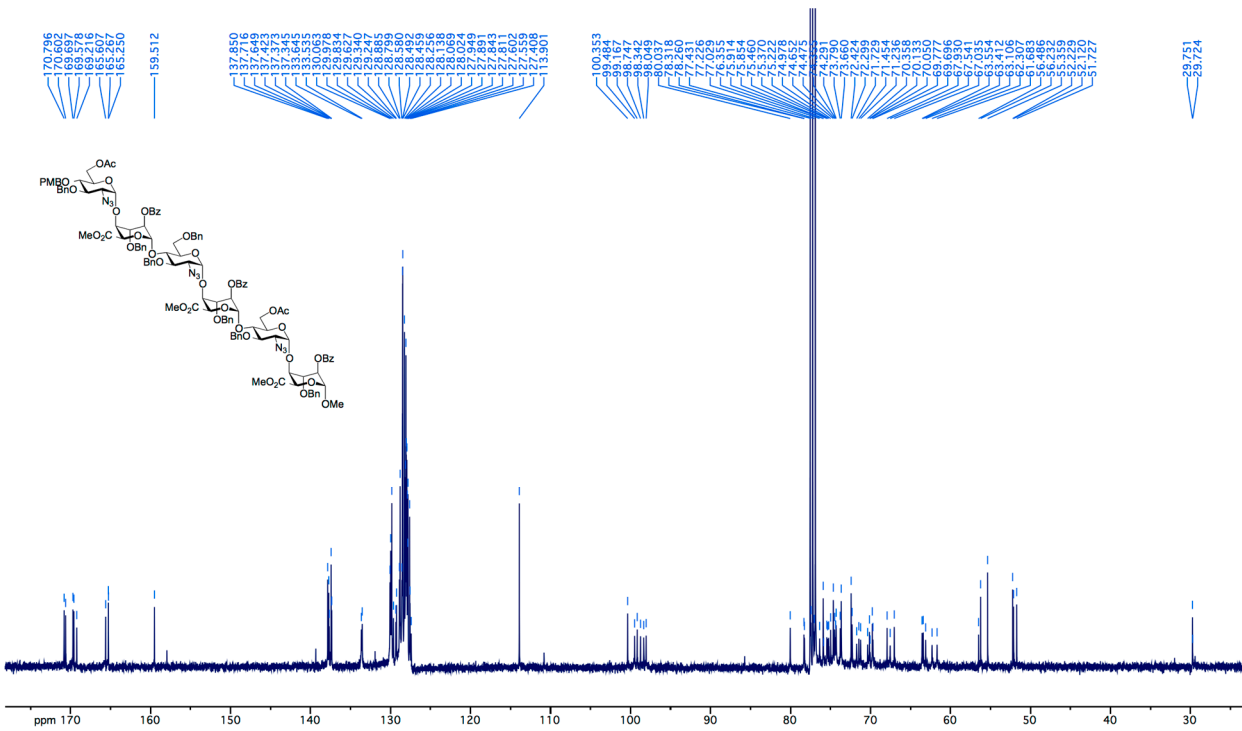

Methyl (6-*O*-acetyl-2-azido-3-*O*-benzyl-2-deoxy-4-*O*-*p*-methoxybenzyl- $\alpha$ -D-glucopyranosyl-(1-4)-(methyl 2-*O*-benzoyl-3-*O*-benzyl- $\alpha$ -L-idopyranosyl) uronate)-(1-4)-2-azido-3,6-di-*O*-benzyl-2-deoxy- $\alpha$ -D-glucopyranosyl-(1-4)-(methyl 2-*O*-benzoyl-3-*O*-benzyl- $\alpha$ -L-idopyranosyl) uronate)-(1-4)-6-*O*-acetyl-2-azido-3-*O*-benzyl-2-deoxy- $\alpha$ -D-glucopyranosyl-(1-4)-(methyl 2-*O*-benzoyl-3-*O*-benzyl- $\alpha$ -L-idopyranoside) urinate (7)

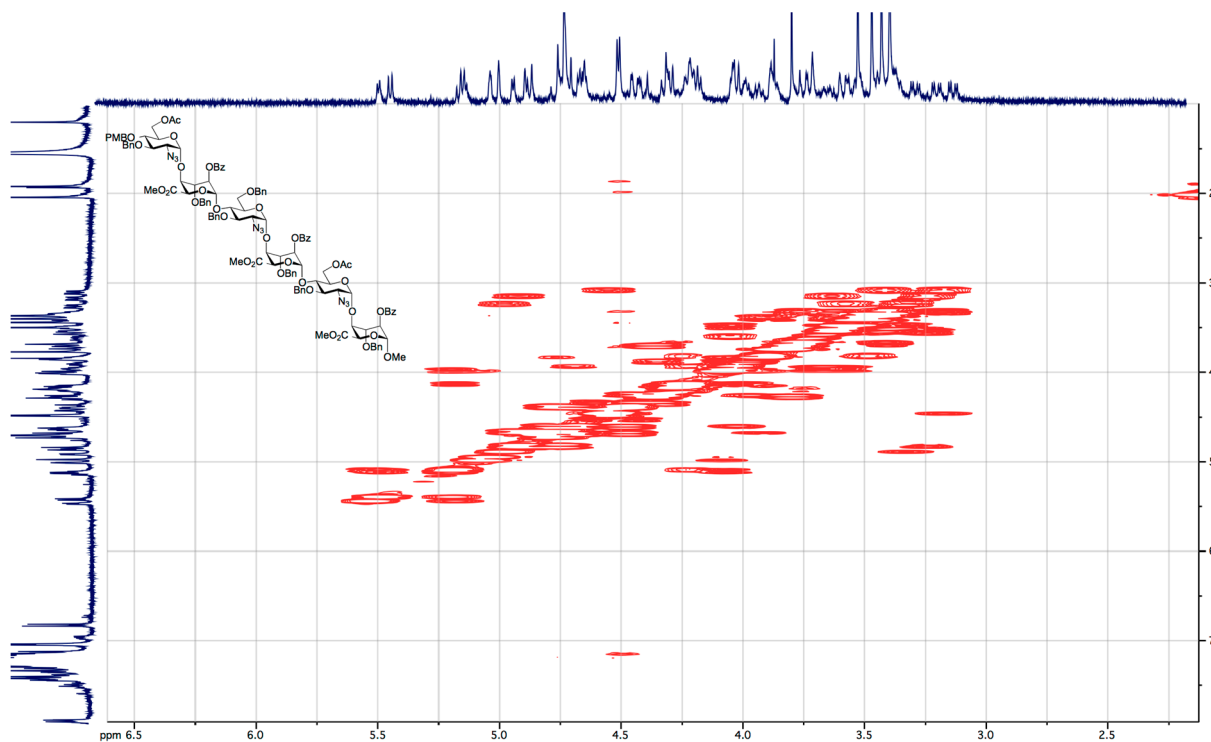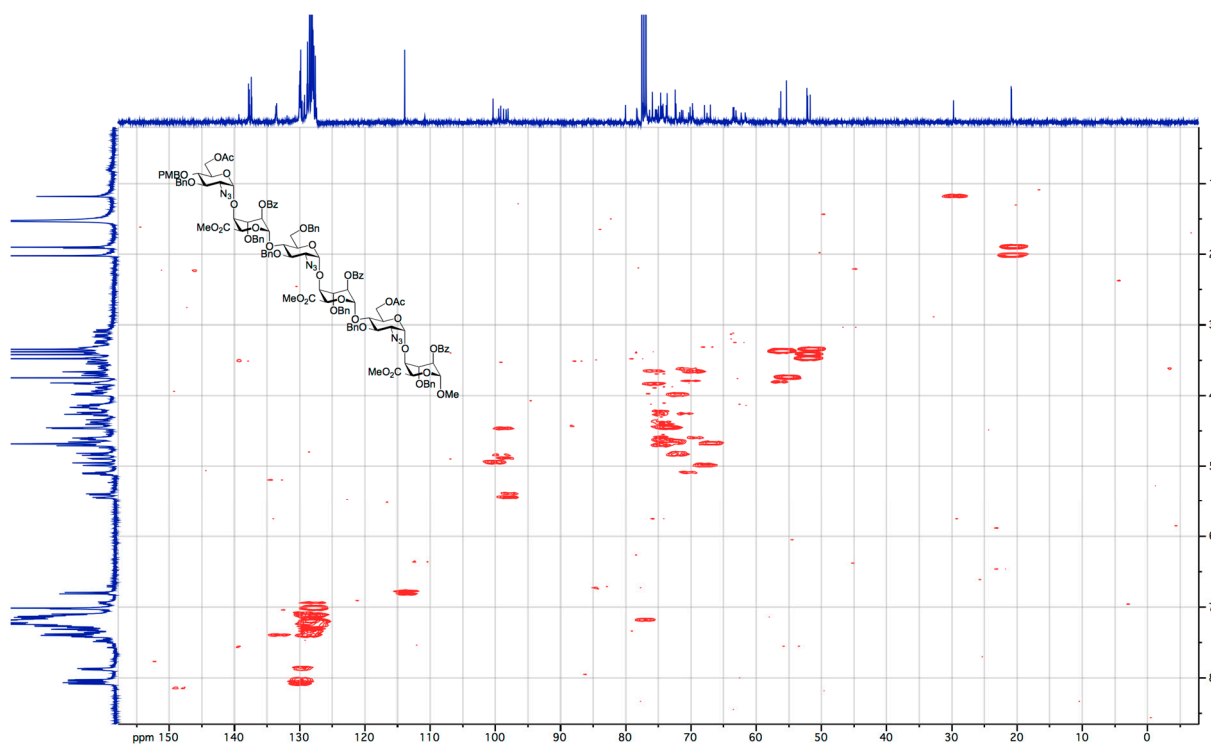



**Methyl (2-azido-3,6-di-*O*-benzyl-2-deoxy-4-*O*-*p*-methoxybenzyl- $\alpha$ -D-glucopyranosyl-(1 $\rightarrow$ 4)-(methyl 2-*O*-benzoyl-3-*O*-benzyl- $\alpha$ -L-idopyranosyl) uronate)-(1 $\rightarrow$ 4)-2-azido-3,6-di-*O*-benzyl-2-deoxy- $\alpha$ -D-glucopyranosyl-(1 $\rightarrow$ 4)-(methyl 2-*O*-benzoyl-3-*O*-benzyl- $\alpha$ -L-idopyranosyl) uronate)-(1 $\rightarrow$ 4)-6-*O*-acetyl-2-azido-3-*O*-benzyl-2-deoxy- $\alpha$ -D-glucopyranosyl-(1 $\rightarrow$ 4)-(methyl 2-*O*-benzoyl-3-*O*-benzyl- $\alpha$ -L-idopyranoside) uronate (8)**

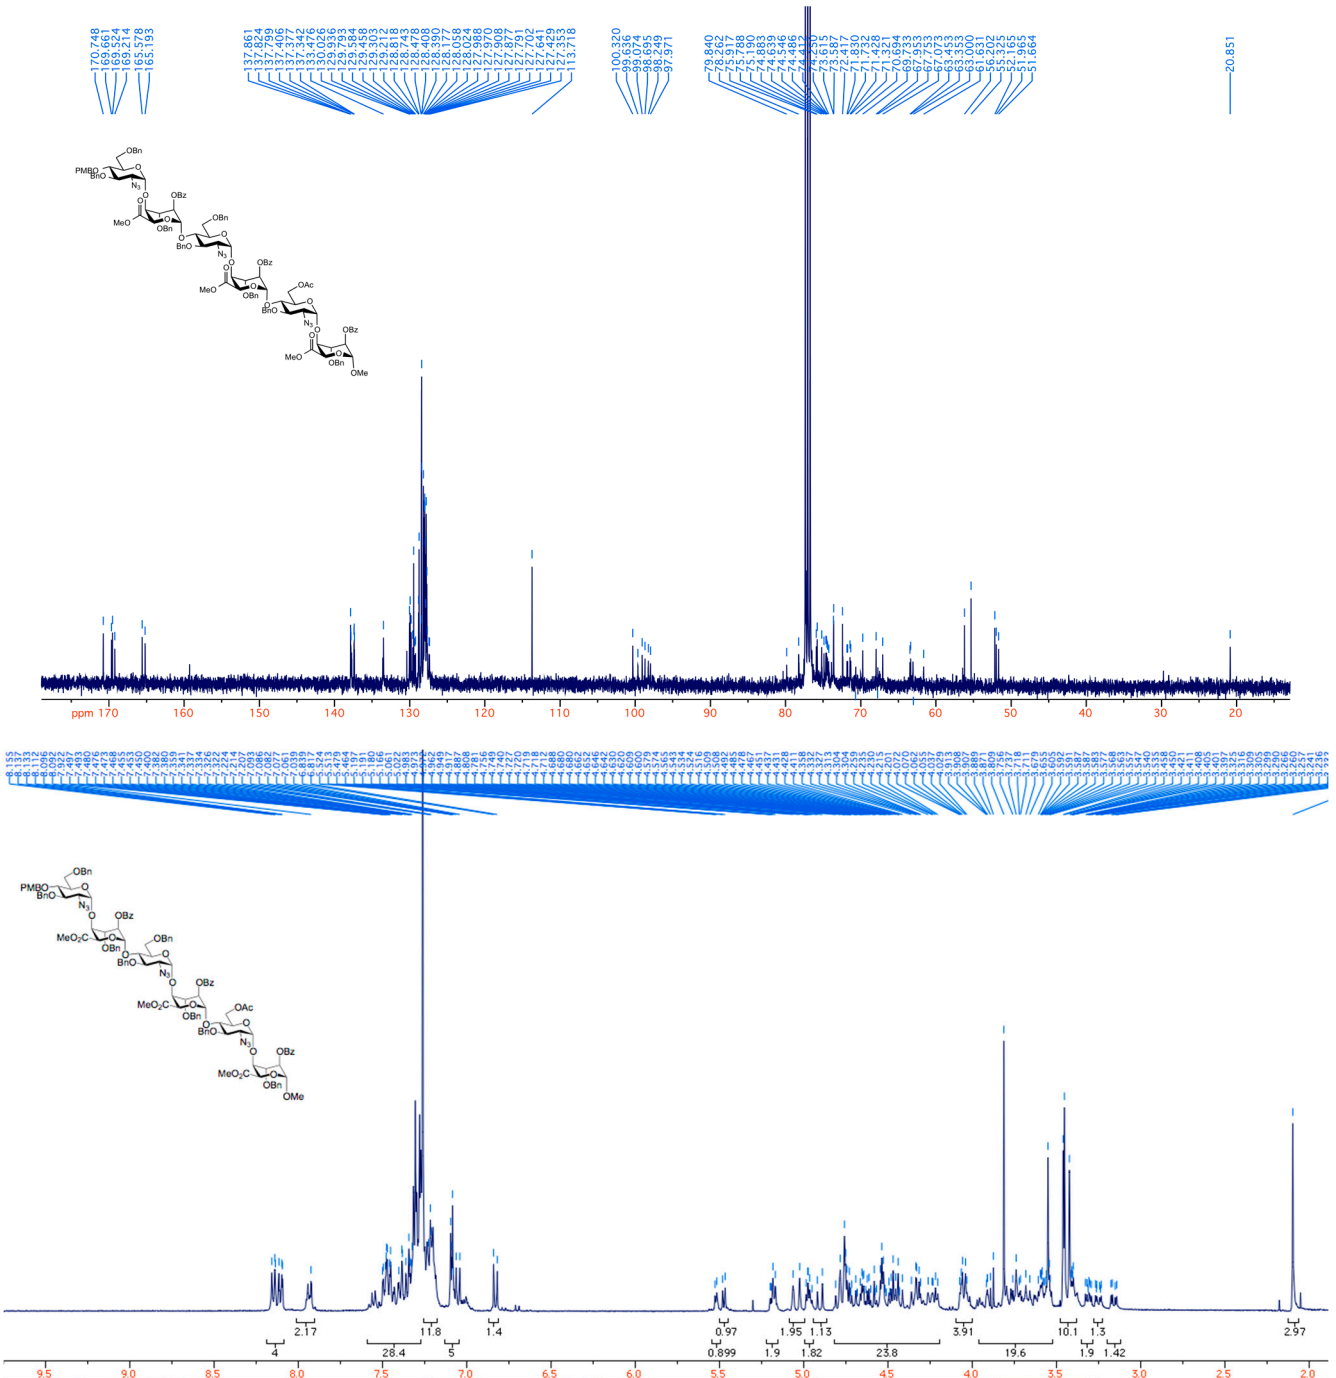



Methyl (2-azido-3,6-di-*O*-benzyl-2-deoxy-4-hydroxy- $\alpha$ -D-glucopyranosyl-(1 $\rightarrow$ 4)-(methyl 2-*O*-benzoyl-3-*O*-benzyl- $\alpha$ -L-idopyranosyl)uronate)-(1 $\rightarrow$ 4)-2-azido-3,6-di-*O*-benzyl-2-deoxy- $\alpha$ -D-glucopyranosyl-(1 $\rightarrow$ 4)-(methyl 2-*O*-benzoyl-3-*O*-benzyl- $\alpha$ -L-idopyranosyl)uronate)-(1 $\rightarrow$ 4)-6-*O*-acetyl-2-azido-3-*O*-benzyl-2-deoxy- $\alpha$ -D-glucopyranosyl-(1 $\rightarrow$ 4)-(methyl 2-*O*-benzoyl-3-*O*-benzyl- $\alpha$ -L-idopyranoside)uronate (O4 deprotection of 8). LCMS 1.

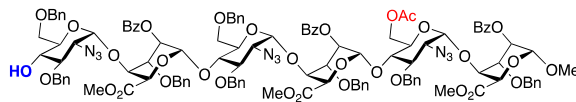

### Display Report

#### Analysis Info

|               |                                                                         |                  |                     |
|---------------|-------------------------------------------------------------------------|------------------|---------------------|
| Analysis Name | MB 05-11 GMA6.D                                                         | Acquisition Date | 16/02/2015 11:38:04 |
| Method        | 100ACN.M                                                                | Operator         | mib                 |
| Sample Name   | MB 05-11/GMA6                                                           | Instrument       | LC-MSD-Trap-SL      |
| Comment       | MB 05-11/GMA6<br>Kinetex XB C18 4.6x100mm 5u<br>100ACN 1ml/min +ve APCI |                  |                     |

#### Acquisition Parameter

|                   |                |              |           |                          |          |
|-------------------|----------------|--------------|-----------|--------------------------|----------|
| Ion Source Type   | APCI           | Ion Polarity | Positive  | Alternating Ion Polarity | off      |
| Mass Range Mode   | Extended       | Scan Begin   | 500 m/z   | Scan End                 | 3000 m/z |
| Capillary Exit    | 211.0 Volt     | Skim 1       | 40.0 Volt | Trap Drive               | 170.7    |
| Accumulation Time | 200000 $\mu$ s | Averages     | 7 Spectra | Auto MS/MS               | off      |

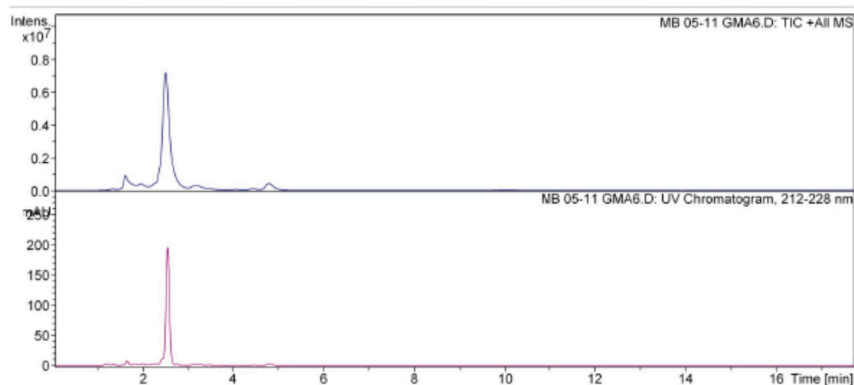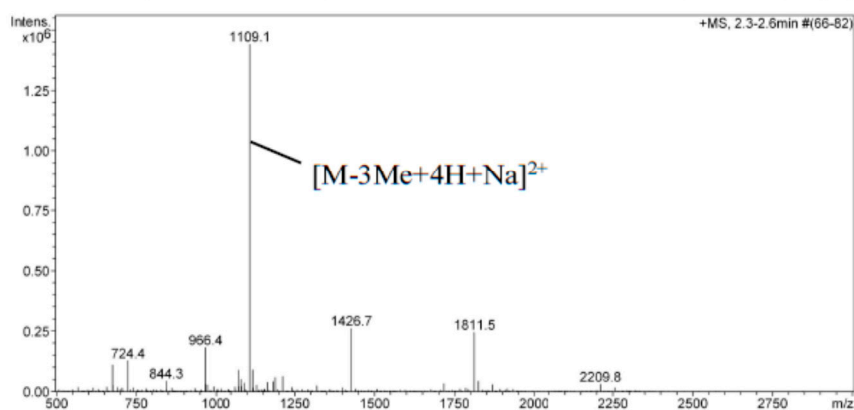

Data File C:\HPCHEM\1\DATA\CD 100ACN 16FEB15\MB 05-11 GMA6.D  
 Sample Name: MB 05-11/GMA6

```

=====
Acq. Operator   : Rehana                      Seq. Line :    2
Acq. Instrument : Instrument 1                 Location  : Vial 6
Injection Date  : 16/02/2015 11:37:39        Inj       :    1
                                           Inj Volume: 50 µl
Different Inj Volume from Sequence 1      Actual Inj Volume : 10 µl
Acq. Method    : C:\HPCHEM\1\METHODS\Rehana APCI LCMS\100ACN.M
Last changed   : 16/02/2015 11:36:43 by Rehana
Analysis Method : C:\HPCHEM\1\METHODS\Rehana APCI LCMS\REHANA 90ACN APCI LCMS.M
Last changed   : 16/02/2015 10:14:50 by Rehana
Sample Info    : MB 05-11/GMA6
                  Kinetex XB C18 4.6x100mm 5u
                  100ACN 1ml/min +ve APCI
=====
  
```

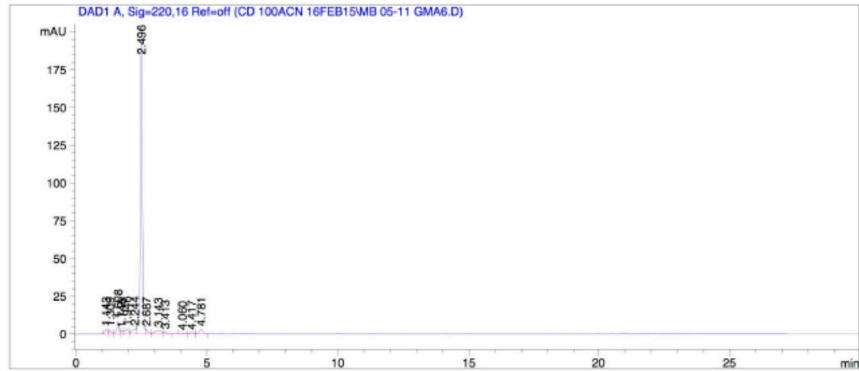

Area Percent Report

```

=====
Sorted By      : Signal
Multiplier     : 1.0000
Dilution      : 1.0000
Use Multiplier & Dilution Factor with ISTDs
  
```

Signal 1: DAD1 A, Sig=220,16 Ref=off

| Peak # | RetTime [min] | Type | Width [min] | Area [mAU*s] | Height [mAU] | Area %  |
|--------|---------------|------|-------------|--------------|--------------|---------|
| 1      | 1.143         | BV   | 0.0941      | 21.93324     | 3.19534      | 1.6290  |
| 2      | 1.309         | VV   | 0.0721      | 14.80308     | 2.97028      | 1.0994  |
| 3      | 1.608         | VV   | 0.0773      | 43.95671     | 8.10042      | 3.2647  |
| 4      | 1.748         | VV   | 0.0926      | 14.72439     | 2.18640      | 1.0936  |
| 5      | 1.946         | VV   | 0.1196      | 29.09728     | 3.34190      | 2.1610  |
| 6      | 2.244         | VV   | 0.1337      | 33.88317     | 3.35726      | 2.5165  |
| 7      | 2.496         | VV   | 0.0850      | 1087.22021   | 195.11391    | 80.7476 |
| 8      | 2.687         | VB   | 0.0930      | 19.19083     | 2.98476      | 1.4253  |
| 9      | 3.143         | BV   | 0.2230      | 35.86568     | 2.28714      | 2.6637  |
| 10     | 3.413         | VB   | 0.1252      | 7.98008      | 9.57534e-1   | 0.5927  |
| 11     | 4.060         | BB   | 0.1267      | 2.79334      | 3.30273e-1   | 0.2075  |
| 12     | 4.417         | BV   | 0.1375      | 6.50855      | 7.06515e-1   | 0.4834  |
| 13     | 4.781         | VB   | 0.1438      | 28.48560     | 3.02598      | 2.1156  |

Totals : 1346.44216 228.55770

**Methyl (2-azido-3,6-di-*O*-benzyl-2-deoxy-4-hydroxy- $\alpha$ -D-glucopyranosyl-(1 $\rightarrow$ 4)-(methyl 2-*O*-benzoyl-3-*O*-benzyl- $\alpha$ -L-idopyranosyl) uronate)-(1 $\rightarrow$ 4)-2-azido-3,6-di-*O*-benzyl-2-deoxy- $\alpha$ -D-glucopyranosyl-(1 $\rightarrow$ 4)-(methyl 2-*O*-benzoyl-3-*O*-benzyl- $\alpha$ -L-idopyranosyl)uronate)-(1 $\rightarrow$ 4)-6-*O*-acetyl-2-azido-3-*O*-benzyl-2-deoxy- $\alpha$ -D-glucopyranosyl-(1 $\rightarrow$ 4)-(methyl 2-*O*-benzoyl-3-*O*-benzyl- $\alpha$ -L-idopyranoside) uronate (O4 deprotection of 8). LCMS 2.**

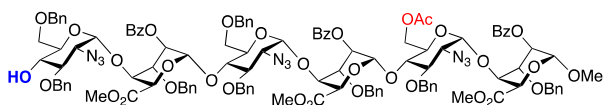

### Display Report

#### Analysis Info

|               |                                                                         |                  |                     |
|---------------|-------------------------------------------------------------------------|------------------|---------------------|
| Analysis Name | MB 05-11 GMA6.D                                                         | Acquisition Date | 16/02/2015 11:38:04 |
| Method        | 100ACN.M                                                                | Operator         | mib                 |
| Sample Name   | MB 05-11/GMA6                                                           | Instrument       | LC-MSD-Trap-SL      |
| Comment       | MB 05-11/GMA6<br>Kinetex XB C18 4.6x100mm 5u<br>100ACN 1ml/min +ve APCI |                  |                     |

#### Acquisition Parameter

|                   |                |              |           |                          |          |
|-------------------|----------------|--------------|-----------|--------------------------|----------|
| Ion Source Type   | APCI           | Ion Polarity | Positive  | Alternating Ion Polarity | off      |
| Mass Range Mode   | Extended       | Scan Begin   | 500 m/z   | Scan End                 | 3000 m/z |
| Capillary Exit    | 211.0 Volt     | Skim 1       | 40.0 Volt | Trap Drive               | 170.7    |
| Accumulation Time | 200000 $\mu$ s | Averages     | 7 Spectra | Auto MS/MS               | off      |

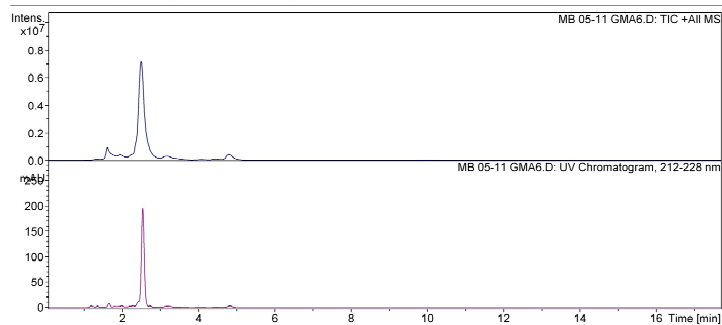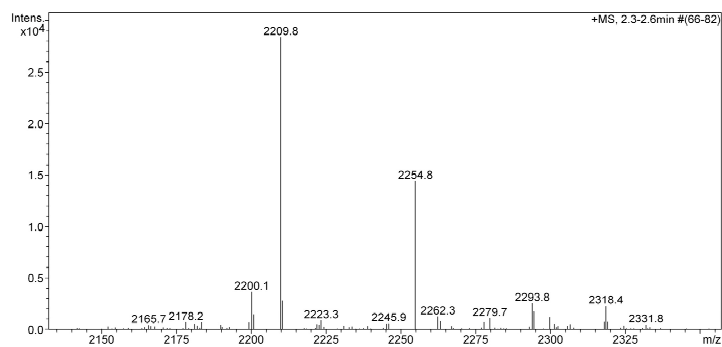

**Methyl (6-*O*-acetyl-2-azido-3-*O*-benzyl-2-deoxy-4-*O*-*p*-methoxy-*m*-iodo-benzyl- $\alpha$ -glucopyranosyl-(1 $\rightarrow$ 4)-(methyl 2-*O*-benzoyl-3-*O*-benzyl- $\alpha$ -L-idopyranosyl) uronate)-(1 $\rightarrow$ 4)-2-azido-3,6-di-*O*-benzyl-2-deoxy- $\alpha$ -D-glucopyranosyl-(1 $\rightarrow$ 4)-(methyl 2-*O*-benzoyl-3-*O*-benzyl- $\alpha$ -L-idopyranosyl) uronate)-(1 $\rightarrow$ 4)-2-azido-3,6-di-*O*-benzyl-2-deoxy- $\alpha$ -D-glucopyranosyl-(1 $\rightarrow$ 4)-(methyl 2-*O*-benzoyl-3-*O*-benzyl- $\alpha$ -L-idopyranosyl)uronate)-(1 $\rightarrow$ 4)-6-*O*-acetyl-2-azido-3-*O*-benzyl-2-deoxy- $\alpha$ -D-glucopyranosyl-(1 $\rightarrow$ 4)-(methyl 2-*O*-benzoyl-3-*O*-benzyl- $\alpha$ -L-idopyranoside) uronate (9)**

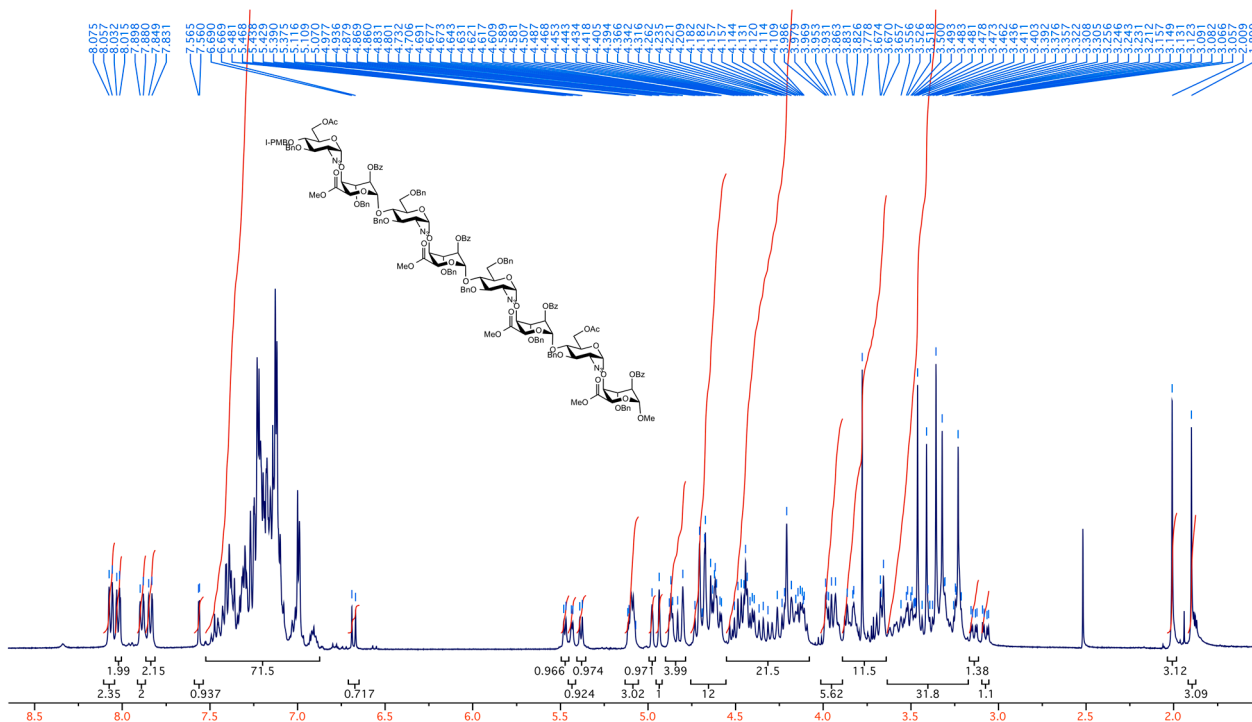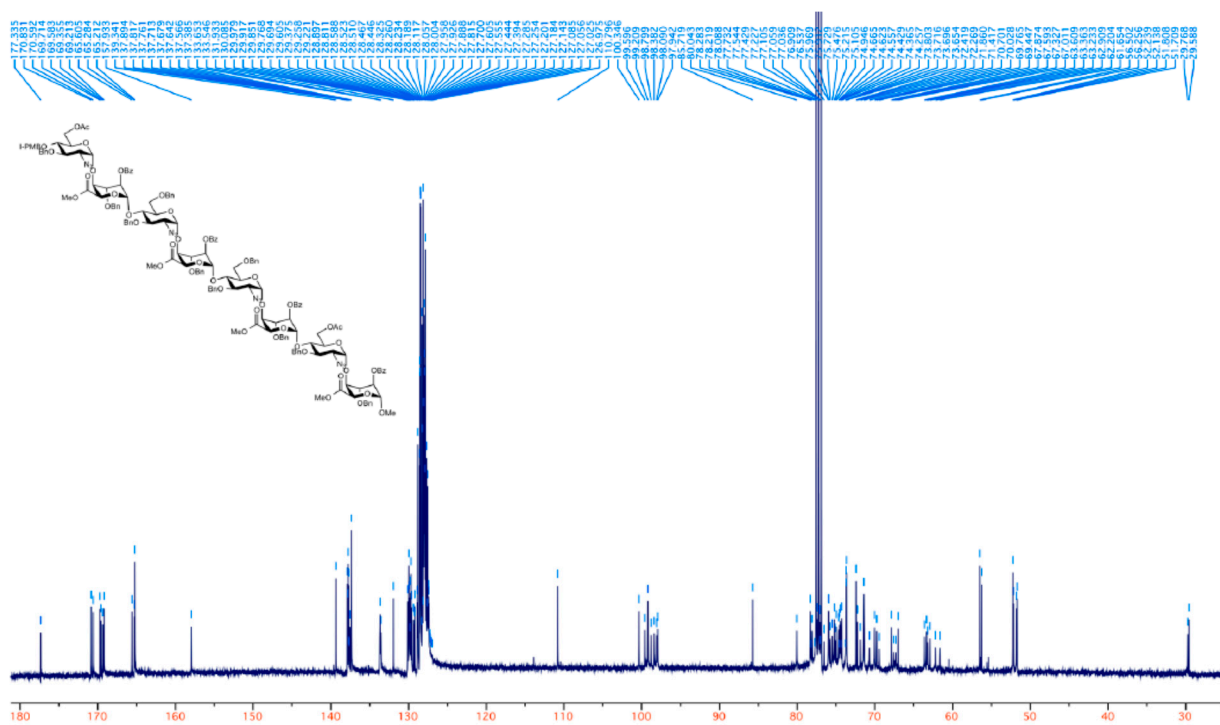

**Methyl (6-*O*-acetyl-2-azido-3-*O*-benzyl-2-deoxy-4-*O*-*p*-methoxy-*m*-iodo-benzyl- $\alpha$ -glucopyranosyl-(1 $\rightarrow$ 4)-(methyl 2-*O*-benzoyl-3-*O*-benzyl- $\alpha$ -L-idopyranosyl) uronate)-(1 $\rightarrow$ 4)-2-azido-3,6-di-*O*-benzyl-2-deoxy- $\alpha$ -D-glucopyranosyl-(1 $\rightarrow$ 4)-(methyl 2-*O*-benzoyl-3-*O*-benzyl- $\alpha$ -L-idopyranosyl) uronate)-(1 $\rightarrow$ 4)-2-azido-3,6-di-*O*-benzyl-2-deoxy- $\alpha$ -D-glucopyranosyl-(1 $\rightarrow$ 4)-(methyl 2-*O*-benzoyl-3-*O*-benzyl- $\alpha$ -L-idopyranosyl)uronate)-(1 $\rightarrow$ 4)-6-*O*-acetyl-2-azido-3-*O*-benzyl-2-deoxy- $\alpha$ -D-glucopyranosyl-(1 $\rightarrow$ 4)-(methyl 2-*O*-benzoyl-3-*O*-benzyl- $\alpha$ -L-idopyranoside) uronate (9)**

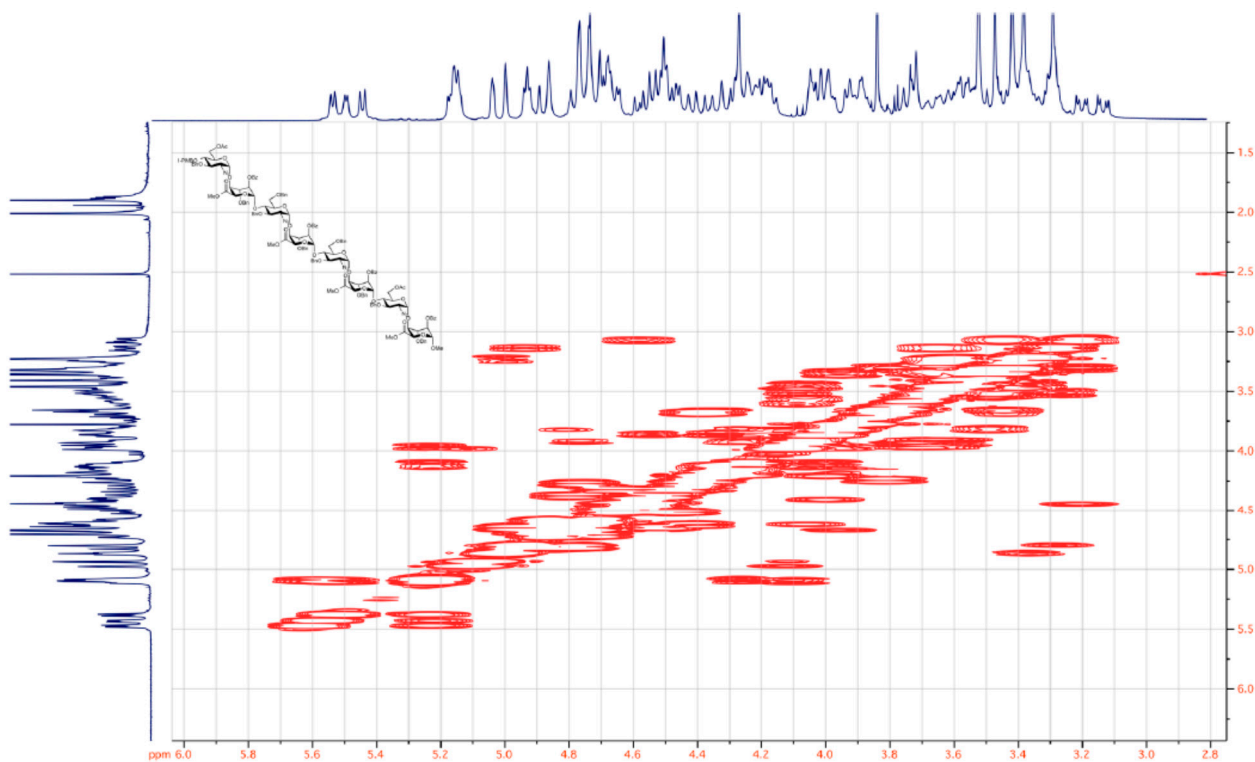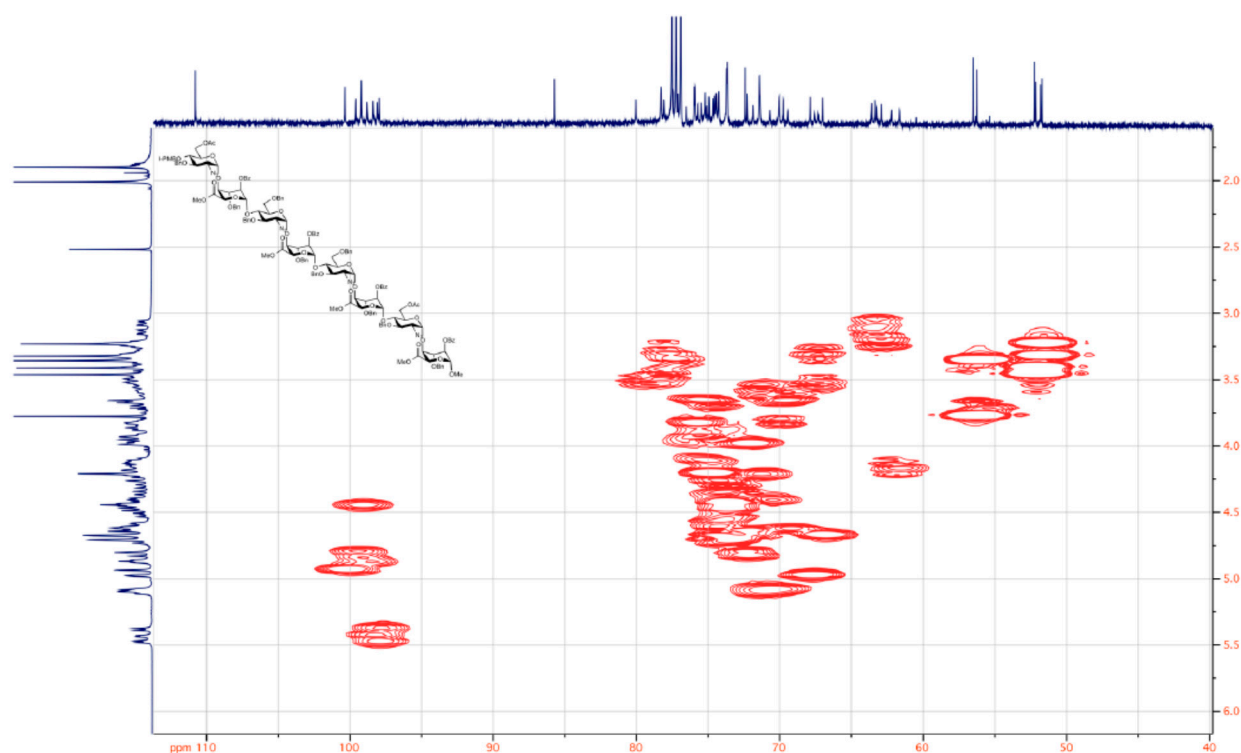

Supplement: NIHMS63113-supplement-Supplementary_file.pdf [file NIHMS63113-supplement-Supplementary_file.pdf]
